# Supplementary material
Source: PubMed Central journal article supplement (PMC9526374)
Supplement: mmc1.pdf [file mmc1.pdf]

# Coronavirus e Worry

---

Gentile partecipante,  
**grazie per la tua disponibilità!**

Considerando l'emergenza sanitaria che noi tutti viviamo, come gruppo di psicologi dell'Università Statale di Milano stiamo conducendo una ricerca che ha l'obiettivo di *esplorare i principali pensieri ed emozioni della popolazione italiana*.

La partecipazione richiede la compilazione di un questionario in cui ti verranno richieste alcune informazioni in merito alle tue opinioni legate all'emergenza presente. La compilazione del questionario richiede circa **15 minuti**.

Non esistono risposte giuste o sbagliate, siamo semplicemente interessati a conoscere il tuo punto di vista. Ti chiediamo di rispondere sinceramente alle domande; i dati verranno utilizzati in modo aggregato e raccolti in forma anonima.

**La partecipazione è completamente libera**; se dovessi cambiare idea e volessi ritirarti, sei libero/a di farlo in qualsiasi momento.

Ti informiamo che lo studio verrà condotto nel rispetto dei principi etici della Dichiarazione di Helsinki" e della Convenzione sui diritti dell'uomo e la biomedicina (Convenzione di Oviedo).

*Nel ringraziarti per la tua collaborazione, ti auguriamo di poter trascorrere nel miglior modo possibile questo tempo.*

Per qualsiasi informazione e/o se desideri ricevere i risultati della ricerca, potrai contattare la dott.ssa Valeria Sebri - [valeria.sebri@unimi.it](mailto:valeria.sebri@unimi.it)

---

Clicca SI se sei disponibile a partecipare a questo studio

SI

---

Età

---

Genere

- MASCHIO
  - FEMMINA
- 

Livello d'istruzione

- Scuola media inferiore
  - Scuola media superiore
  - Laurea Triennale
  - Laurea Magistrale
  - Dottorato/Post Lauream
- 

Professione

---

Stato lavorativo attuale

- Smartworking
  - Ferie obbligate
  - Permesso retribuito
  - Cassa integrazione
  - Chiusura attività in quanto proprietario
  - Continuo a lavorare
  - Disoccupato
-

In quale regione d'Italia vivi attualmente?

- Abruzzo
- Basilicata
- Calabria
- Campania
- Emilia-Romagna
- Friuli Venezia Giulia
- Lazio
- Liguria
- Lombardia
- Marche
- Molise
- Piemonte
- Puglia
- Sardegna
- Sicilia
- Toscana
- Trentino-Alto Adige
- Umbria
- Valle D'Aosta
- Veneto

---

In quale provincia vivi attualmente?

---

Con chi abiti attualmente?

- Da solo
- Con la famiglia d'origine
- Con il partner
- Con il partner e figlio/i
- Con dei coinquilini

---

Page Break

---

Sei risultato positivo al coronavirus? (Rispondi SI solo in caso di comprovato tampone positivo)

- SI
- NO

---

Qualcuno a te molto vicino è risultato positivo al coronavirus? (Rispondi SI solo in caso di comprovato tampone positivo)

- SI
- NO
- Se si, specificare \_\_\_\_\_

**Overall Concern.** Pensando alla tua situazione tra 3 mesi, indica il tuo grado di preoccupazione da 1 a 5 rispetto alle seguenti situazioni (1=per niente preoccupato; 5=molto preoccupato)

|                                                                                       | 1. Per niente preoccupato<br>(1) | 2. Poco preoccupato<br>(2) | 3. Un pò preoccupato<br>(3) | 4. Abbastanza preoccupato<br>(4) | 5. Molto preoccupato<br>(5) |
|---------------------------------------------------------------------------------------|----------------------------------|----------------------------|-----------------------------|----------------------------------|-----------------------------|
| Situazione economica                                                                  | <input type="radio"/>            | <input type="radio"/>      | <input type="radio"/>       | <input type="radio"/>            | <input type="radio"/>       |
| Sovraccarico lavorativo/di studio                                                     | <input type="radio"/>            | <input type="radio"/>      | <input type="radio"/>       | <input type="radio"/>            | <input type="radio"/>       |
| Riprendere il mio ritmo di vita precedente                                            | <input type="radio"/>            | <input type="radio"/>      | <input type="radio"/>       | <input type="radio"/>            | <input type="radio"/>       |
| Recuperare gli impegni rimandati in questo periodo                                    | <input type="radio"/>            | <input type="radio"/>      | <input type="radio"/>       | <input type="radio"/>            | <input type="radio"/>       |
| Stare fisicamente a contatto con tante persone sconosciute                            | <input type="radio"/>            | <input type="radio"/>      | <input type="radio"/>       | <input type="radio"/>            | <input type="radio"/>       |
| Stare fisicamente a contatto con tante persone che frequentavo abitualmente           | <input type="radio"/>            | <input type="radio"/>      | <input type="radio"/>       | <input type="radio"/>            | <input type="radio"/>       |
| Ritornare alla quotidianità                                                           | <input type="radio"/>            | <input type="radio"/>      | <input type="radio"/>       | <input type="radio"/>            | <input type="radio"/>       |
| Dover rinunciare ad alcuni progetti (ad esempio, vacanze, gite, trasferte lavorative) | <input type="radio"/>            | <input type="radio"/>      | <input type="radio"/>       | <input type="radio"/>            | <input type="radio"/>       |

Possibilità di  
contrarre il  
virus

Possibilità  
che qualche  
persona a me  
cara  
contragga il  
virus

Ritorno di  
questa  
emergenza  
sanitaria in  
futuro

STAI-Y1. Sono qui di seguito riportate alcune frasi che le persone spesso usano per descriversi. Indica la risposta che ti sembra descrivere meglio i tuoi **attuali stati d'animo** da 1 a 4 (1=per nulla; 2= un po'; 3=abbastanza; 4=moltissimo)

|                                                      | Per nulla (1)         | Un po' (2)            | Abbastanza (3)        | Moltissimo (4)        |
|------------------------------------------------------|-----------------------|-----------------------|-----------------------|-----------------------|
| Mi sento calmo                                       | <input type="radio"/> | <input type="radio"/> | <input type="radio"/> | <input type="radio"/> |
| Mi sento sicuro                                      | <input type="radio"/> | <input type="radio"/> | <input type="radio"/> | <input type="radio"/> |
| Mi sento teso                                        | <input type="radio"/> | <input type="radio"/> | <input type="radio"/> | <input type="radio"/> |
| Mi sento sotto pressione                             | <input type="radio"/> | <input type="radio"/> | <input type="radio"/> | <input type="radio"/> |
| Mi sento tranquillo                                  | <input type="radio"/> | <input type="radio"/> | <input type="radio"/> | <input type="radio"/> |
| Mi sento turbato                                     | <input type="radio"/> | <input type="radio"/> | <input type="radio"/> | <input type="radio"/> |
| Sono attualmente preoccupato per possibili disgrazie | <input type="radio"/> | <input type="radio"/> | <input type="radio"/> | <input type="radio"/> |
| Mi sento soddisfatto                                 | <input type="radio"/> | <input type="radio"/> | <input type="radio"/> | <input type="radio"/> |
| Mi sento intimorito                                  | <input type="radio"/> | <input type="radio"/> | <input type="radio"/> | <input type="radio"/> |
| Mi sento a mio agio                                  | <input type="radio"/> | <input type="radio"/> | <input type="radio"/> | <input type="radio"/> |
| Mi sento sicuro di me                                | <input type="radio"/> | <input type="radio"/> | <input type="radio"/> | <input type="radio"/> |
| Mi sento nervoso                                     | <input type="radio"/> | <input type="radio"/> | <input type="radio"/> | <input type="radio"/> |
| Sono agitato                                         | <input type="radio"/> | <input type="radio"/> | <input type="radio"/> | <input type="radio"/> |
| Mi sento indeciso                                    | <input type="radio"/> | <input type="radio"/> | <input type="radio"/> | <input type="radio"/> |
| Sono rilassato                                       | <input type="radio"/> | <input type="radio"/> | <input type="radio"/> | <input type="radio"/> |
| Mi sento contento                                    | <input type="radio"/> | <input type="radio"/> | <input type="radio"/> | <input type="radio"/> |
| Sono preoccupato                                     | <input type="radio"/> | <input type="radio"/> | <input type="radio"/> | <input type="radio"/> |
| Mi sento confuso                                     | <input type="radio"/> | <input type="radio"/> | <input type="radio"/> | <input type="radio"/> |
| Mi sento disteso                                     | <input type="radio"/> | <input type="radio"/> | <input type="radio"/> | <input type="radio"/> |



Mi sento bene

-----

**PSWQ. In merito all'emergenza COVID-19**, indica il tuo grado di accordo da 1 a 5 con ciascuna delle seguenti affermazioni **nelle ultime 2 settimane**

|                                                                                          | 1. Per niente d'accordo (1) | 2 (2)                 | 3. Abbastanza d'accordo (3) | 4 (4)                 | 5. Completamente d'accordo (6) |
|------------------------------------------------------------------------------------------|-----------------------------|-----------------------|-----------------------------|-----------------------|--------------------------------|
| Anche se non ho tempo a sufficienza per svolgere tutte le mie attività, non mi preoccupo | <input type="radio"/>       | <input type="radio"/> | <input type="radio"/>       | <input type="radio"/> | <input type="radio"/>          |
| Le mie preoccupazioni mi invadono e non riesco a liberarmene                             | <input type="radio"/>       | <input type="radio"/> | <input type="radio"/>       | <input type="radio"/> | <input type="radio"/>          |
| Non tendo a preoccuparmi per le cose                                                     | <input type="radio"/>       | <input type="radio"/> | <input type="radio"/>       | <input type="radio"/> | <input type="radio"/>          |
| Molte situazioni sono fonte di preoccupazione per me                                     | <input type="radio"/>       | <input type="radio"/> | <input type="radio"/>       | <input type="radio"/> | <input type="radio"/>          |
| Non posso fare a meno di preoccuparmi, anche se so che non dovrei                        | <input type="radio"/>       | <input type="radio"/> | <input type="radio"/>       | <input type="radio"/> | <input type="radio"/>          |
| Ho notato che quando sono sotto pressione mi preoccupo molto                             | <input type="radio"/>       | <input type="radio"/> | <input type="radio"/>       | <input type="radio"/> | <input type="radio"/>          |
| Sono sempre preoccupato per qualcosa                                                     | <input type="radio"/>       | <input type="radio"/> | <input type="radio"/>       | <input type="radio"/> | <input type="radio"/>          |

Riesco a liberarmi delle preoccupazioni con facilità

Appena finisco un compito, inizio a preoccuparmi per qualunque altra cosa devo fare

É raro che io mi preoccupi per qualcosa

Quando non c'è altro che io possa fare riguardo a un problema, allora smetto di preoccuparmi

Da sempre sono una persona che si preoccupa

Sono così abituato a preoccuparmi che spesso non me ne rendo conto

Una volta che inizio a preoccuparmi, non posso fermarmi

Passo gran parte del mio tempo a preoccuparmi

Finché una cosa non è fatta continua ad

essere al centro  
delle mie  
preoccupazioni

---

**Brief COPE. Pensando all'emergenza COVID-19**, indica il tuo grado di accordo con le seguenti affermazioni nelle **ultime 2 settimane** su una scala da 1 a 4

|                                                                                                    | Non faccio assolutamente questo (1) | Faccio questo poche volte (2) | Faccio questo in misura moderata (3) | Faccio proprio così (4) |
|----------------------------------------------------------------------------------------------------|-------------------------------------|-------------------------------|--------------------------------------|-------------------------|
| Mi applico al lavoro o ad altre attività sostitutive per distogliere la mia mente dagli eventi (1) | <input type="radio"/>               | <input type="radio"/>         | <input type="radio"/>                | <input type="radio"/>   |
| Concentro i miei sforzi nel fare qualcosa per la situazione in cui mi trovo (29)                   | <input type="radio"/>               | <input type="radio"/>         | <input type="radio"/>                | <input type="radio"/>   |
| Mi dico "questo non è reale" (3)                                                                   | <input type="radio"/>               | <input type="radio"/>         | <input type="radio"/>                | <input type="radio"/>   |
| Faccio uso di alcol o di stupefacenti per sentirmi meglio (4)                                      | <input type="radio"/>               | <input type="radio"/>         | <input type="radio"/>                | <input type="radio"/>   |
| Cerco di ottenere un supporto emotivo dagli altri (5)                                              | <input type="radio"/>               | <input type="radio"/>         | <input type="radio"/>                | <input type="radio"/>   |
| Rinuncio a cercare di occuparmene (6)                                                              | <input type="radio"/>               | <input type="radio"/>         | <input type="radio"/>                | <input type="radio"/>   |
| Metto in atto azioni per cercare di migliorare la situazione (7)                                   | <input type="radio"/>               | <input type="radio"/>         | <input type="radio"/>                | <input type="radio"/>   |
| Rifiuto di credere che sia accaduto (8)                                                            | <input type="radio"/>               | <input type="radio"/>         | <input type="radio"/>                | <input type="radio"/>   |
| Dico cose che lasciano venir fuori i miei sentimenti spiacevoli (9)                                | <input type="radio"/>               | <input type="radio"/>         | <input type="radio"/>                | <input type="radio"/>   |
| Cerco aiuto e consigli da parte degli altri (10)                                                   | <input type="radio"/>               | <input type="radio"/>         | <input type="radio"/>                | <input type="radio"/>   |
| Faccio uso di alcol o droghe per aiutarmi a superare questo (11)                                   | <input type="radio"/>               | <input type="radio"/>         | <input type="radio"/>                | <input type="radio"/>   |
| Cerco di vedere la cosa in una luce                                                                | <input type="radio"/>               | <input type="radio"/>         | <input type="radio"/>                | <input type="radio"/>   |

|                                                                                                                                               |                       |                       |                       |                       |
|-----------------------------------------------------------------------------------------------------------------------------------------------|-----------------------|-----------------------|-----------------------|-----------------------|
| diversa per farla apparire più positiva (12)                                                                                                  |                       |                       |                       |                       |
| Sono autocritico (13)                                                                                                                         | <input type="radio"/> | <input type="radio"/> | <input type="radio"/> | <input type="radio"/> |
| Cerco di trovare una strategia per ciò che si deve fare (14)                                                                                  | <input type="radio"/> | <input type="radio"/> | <input type="radio"/> | <input type="radio"/> |
| Cerco confronto e comprensione dagli altri (15)                                                                                               | <input type="radio"/> | <input type="radio"/> | <input type="radio"/> | <input type="radio"/> |
| Rinuncio a tentare di affrontare la situazione (16)                                                                                           | <input type="radio"/> | <input type="radio"/> | <input type="radio"/> | <input type="radio"/> |
| Cerco di trovare qualcosa di buono in ciò che è accaduto (17)                                                                                 | <input type="radio"/> | <input type="radio"/> | <input type="radio"/> | <input type="radio"/> |
| Ci scherzo sopra (18)                                                                                                                         | <input type="radio"/> | <input type="radio"/> | <input type="radio"/> | <input type="radio"/> |
| Faccio qualcosa per pensare di meno a questo, come guardare la televisione, leggere, sognare ad occhi aperti, dormire, fare spese online (19) | <input type="radio"/> | <input type="radio"/> | <input type="radio"/> | <input type="radio"/> |
| Accetto la realtà del fatto che ciò è accaduto (30)                                                                                           | <input type="radio"/> | <input type="radio"/> | <input type="radio"/> | <input type="radio"/> |
| Esprimo le mie sensazioni negative (31)                                                                                                       | <input type="radio"/> | <input type="radio"/> | <input type="radio"/> | <input type="radio"/> |
| Cerco di trovare conforto nella mia religione o nelle mie convinzioni spirituali (22)                                                         | <input type="radio"/> | <input type="radio"/> | <input type="radio"/> | <input type="radio"/> |
| Cerco di ottenere dagli altri consigli o aiuti su ciò che è necessario fare (32)                                                              | <input type="radio"/> | <input type="radio"/> | <input type="radio"/> | <input type="radio"/> |
| Imparo a convivere (24)                                                                                                                       | <input type="radio"/> | <input type="radio"/> | <input type="radio"/> | <input type="radio"/> |
| Penso seriamente a quali mosse fare (25)                                                                                                      | <input type="radio"/> | <input type="radio"/> | <input type="radio"/> | <input type="radio"/> |

Rimprovero me  
stesso per quanto è  
accaduto (26)

Prego o medito (27)

Metto in ridicolo la  
situazione (28)

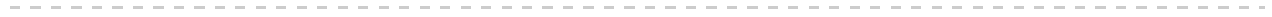

Ti ringraziamo per la tua collaborazione, il questionario è terminato. Se sei interessato a partecipare alla seconda parte di questa ricerca , puoi indicare il tuo indirizzo mail nella sezione sottostante e verrai ricontattato tra alcuni mesi dal ricercatore responsabile dello studio o da un membro dell'equipe di ricerca.

Precisiamo che il tuo indirizzo mail non verrà associato alle tue risposte date in precedenza.

E-mail:

---

---
